# Supplementary material
Source: publisher figshare collection journal article supplement (https://frontiersin.figshare.com/ndownloader/files/34852227)
Supplement: Supplementary file [file 34852227]

## Supplementary Material

### 1 SUPPLEMENTARY METHODS

#### 1.1 EEG acquisition and EOG analysis

In both experiments, participants were instructed to look at the center of the screen during the presentation of the target and the delay period, while they were free to move their eyes during the response and the inter-trial interval. However, participants' gaze was not monitored and controlled in real time. This could be problematic because eye movements and gazing angles have been shown to have strong effects on activity in brain regions commonly associated with working memory processes, and without eye movement control, it would be more difficult to distinguish between pure working memory activation and eye movement related activity (Funahashi, 2015). Nonetheless, simultaneous fMRI-EEG recording in Experiment II enabled the study of eye movements using electrooculography (EOG) signal extracted from the EEG data.

EEG data were recorded simultaneously with the fMRI BOLD images using a Brain Products MR compatible EEG system with 128 electrodes (BrainAmp MR, Brain Products GmbH, Gilching, Germany). The impedance of the electrodes was kept below 15 k $\Omega$ . Data were recorded at a sampling rate of 5000 Hz. During recording, high-pass filtering with a time constant of 10 s and low-pass filtering with a cutoff frequency of 250 Hz were performed. The recorded signals for all electrodes were referenced to the vertex electrode (FCz).

Preprocessing and analysis of EEG data was performed in Matlab (R2020a, Natick, Massachusetts). First, imaging artifacts were removed with the average artifact subtraction algorithm using 25 averaging windows (Niazy et al., 2005; Allen et al., 2000). For movement-related MR-induced artifact removal, we used the carbon wire loop system as described by van der Meer et al. (2016). We further preprocessed the EEG signal to remove power line noise using the CleanLine method (Mullen, 2012), and a bandpass filter between 0.01 Hz and 100 Hz was applied (Hamming windowed-sinc FIR filter). The signal from each channel was re-referenced to the average signal and downsampled to 500 Hz. The horizontal EOG signal was calculated from the difference between the left (F9) and right (F10) temporal electrodes. For the vertical EOG signal, the electrodes above the left (Fp1) and right (Fp2) eyes were averaged. To detect horizontal and vertical eye movements, we used the free-viewing saccade detection method described by Jia and Tyler (2019).

First, we excluded any participants (total 6 participants) or individual sessions that had incomplete EEG recordings or poor data quality. We also excluded all epochs with poor data quality and all trials that were not used to estimate the BOLD signal. The detection of saccades from the EOG signal showed that participants generally did not move their eyes on more than 7.81% (median, IQR = 15.8%) of trials during the *center* condition and 11.1% (median, IQR = 16.7%) of trials during the *off-center* condition. Based on these results, we assumed that participants generally followed instructions (including those for whom we had no eye movement information), and we considered all participants for further analyses.

Because the analysis of the behavioral and fMRI data focused primarily on differences between task conditions, we wanted to rule out the possibility that a difference between conditions was either an artefact of, or masked by, the difference in saccade occurrence. We used logistic regression to test for differences in saccade frequency and found no evidence of a systematic effect of task condition ( $\beta = 0.258$ ,  $Z = 1.87$ ,  $p = .061$ ,  $OR = 1.29$ ).

## 2 SUPPLEMENTARY FIGURES

### A. Pattern of response errors during center and off-center

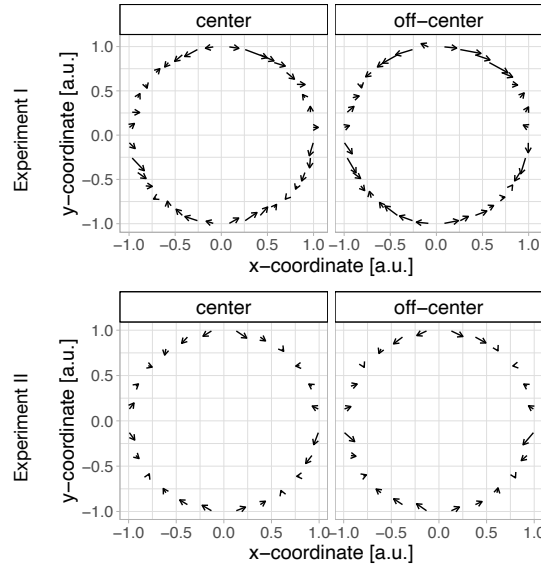

### B. Systematic biases during center and off-center

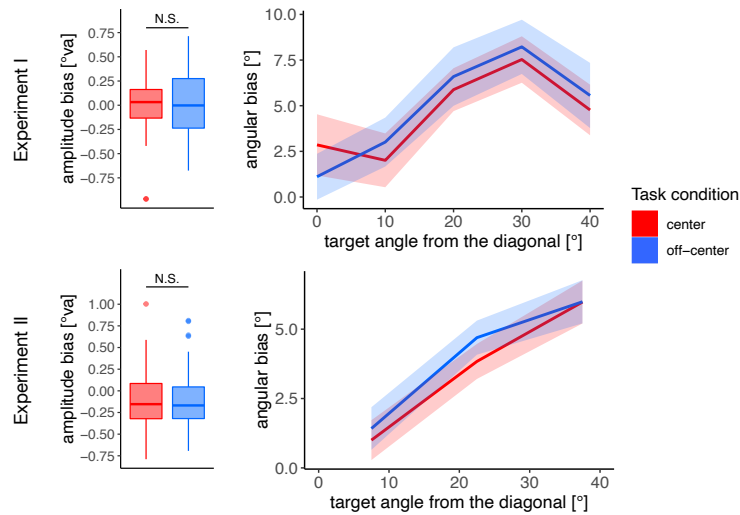

**Figure S1. Patterns of response errors and average systematic biases during *center* and *off-center* conditions.** **A.** The averaged response errors at different target locations for the *center* and *off-center* conditions in both experiments. Investigation of the response patterns revealed systematic biases in the amplitude and angular errors. The results showed that individual subjects tended to either overshoot or undershoot their responses on average, which was reflected in the amplitude error. In addition, subjects tended to shift their responses closer to the nearest diagonals, which was reflected in larger angular errors at target angles further from the nearest diagonal. **B.** The average amplitude bias for each task condition and the average angular bias at different target angles from the nearest diagonal for each task condition. N.S. – not significant.

## A. Events modeled in GLM analysis

trial onset delay early delay late delay response

### Experiment I

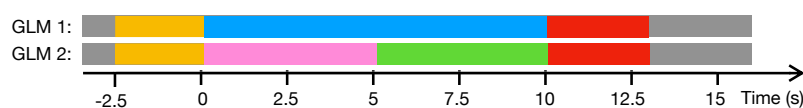

### Experiment II

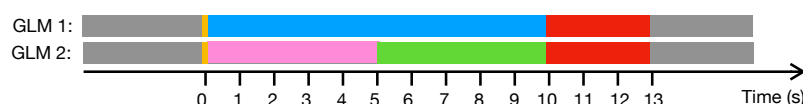

## B. Dense whole-brain delay activity during individual task conditions

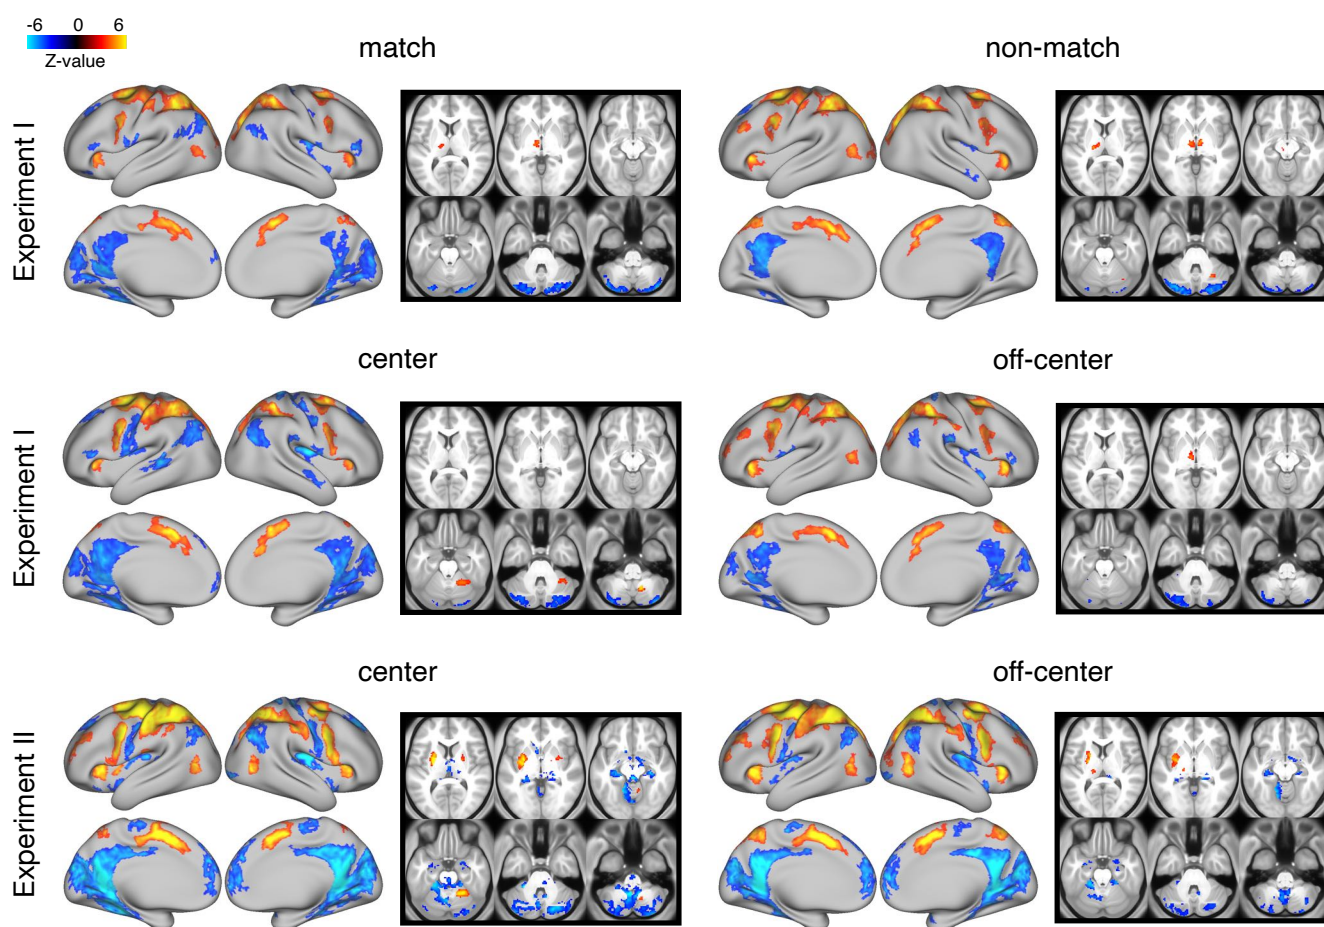

**Figure S2. Events modeled in GLM analysis and average delay activity for individual task conditions based on the dense whole-brain analysis.** **A.** The timing and duration of events modeled in the GLM analysis of the fMRI data. First, we performed the GLM analysis with events trial onset, delay, and response for both experiments. Next, we decomposed the delay period into separate regressors for early and late delay. **B.** The average delay activity during individual task conditions for both experiments. Images were obtained by a one-sample *t*-test of the GLM regressor during the delay period, corrected with cluster ( $C = 3.1$ ) FWE, and thresholded at  $p < 0.05$ .

## Parcellated delay activity during individual task conditions

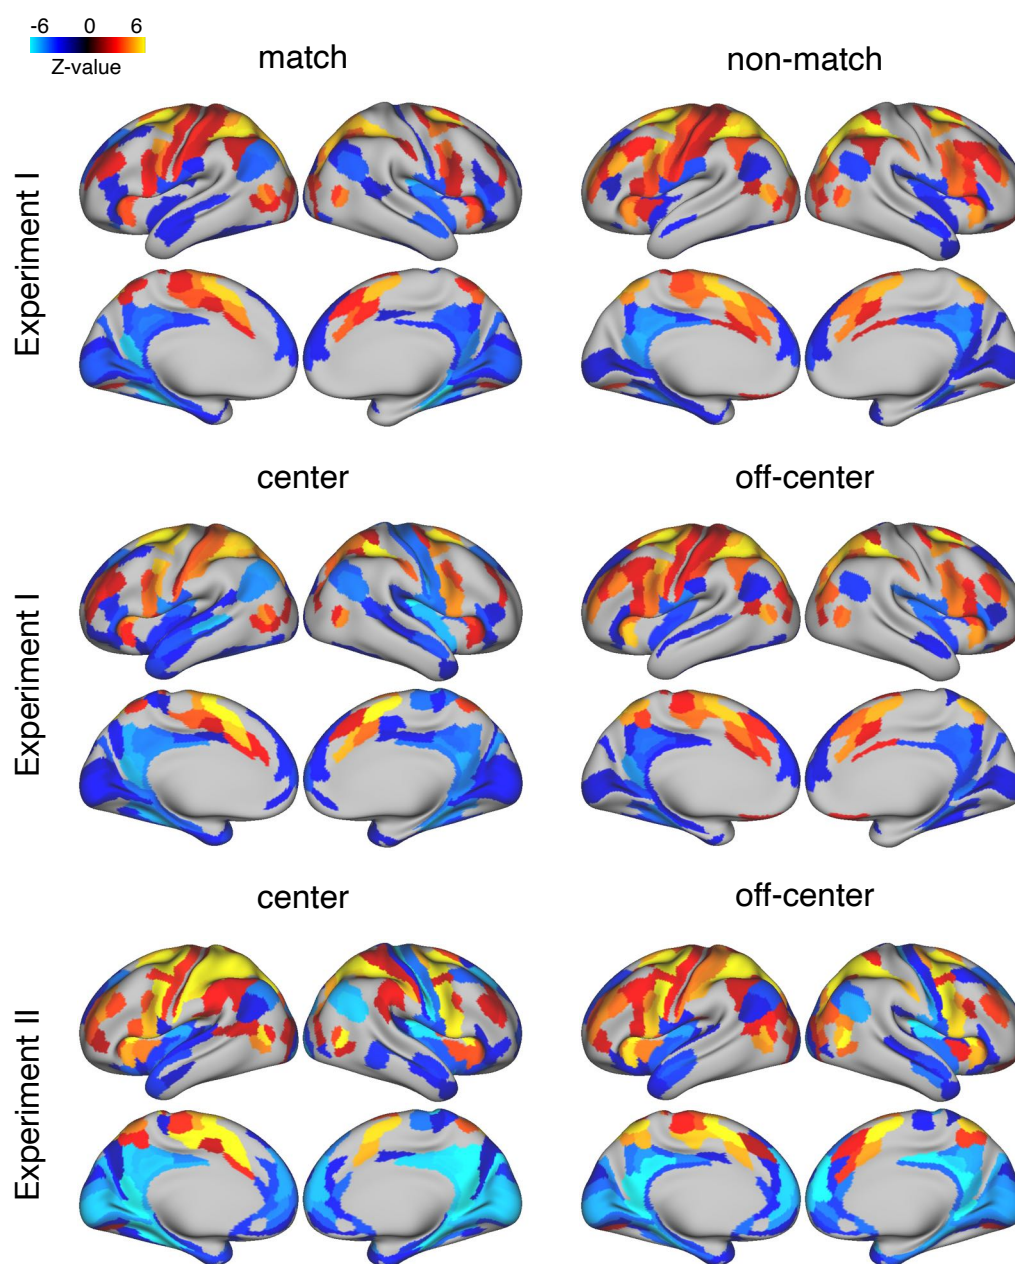

**Figure S3. Average delay activity during individual task conditions based on analysis of parcellated data.** The images show the average delay activity during individual task conditions within specific HCP parcels for both experiments. Results were obtained by a one-sample  $t$ -test of the GLM regressor during the delay period, corrected with FDR and thresholded at  $q < 0.05$ .



### A. Delay – Comparison across task conditions and experiments

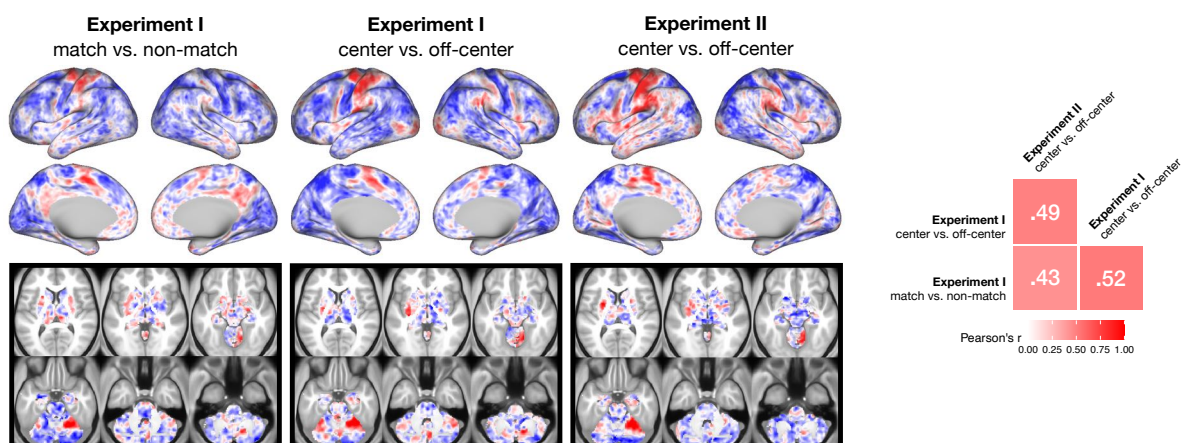

### B. Early delay – Comparison across task conditions and experiments

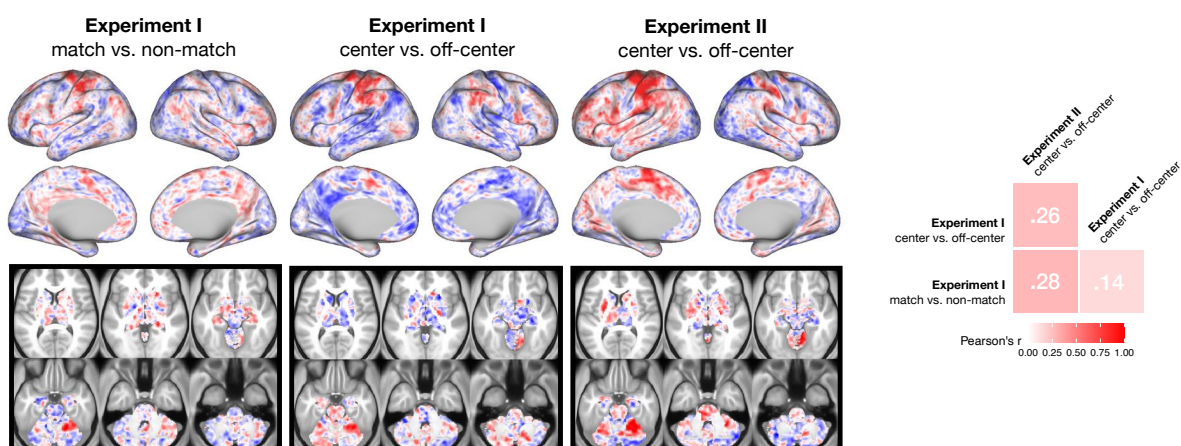

### C. Late delay – Comparison across task conditions and experiments

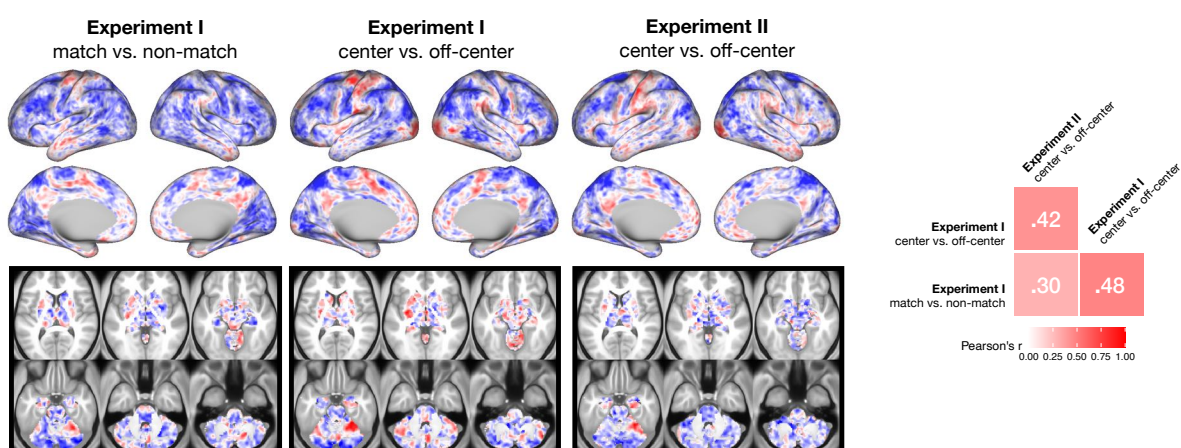

match < non-match      -3.5      0      3.5      match > non-match  
center < off-center      Z-value      center > off-center

**Figure S4. Consistency of delay-related differences across different task conditions and experiments.** Presented are unthresholded Z-maps of either **A.** delay, **B.** early delay or **C.** late delay activity differences between specific pairs of task conditions, namely *match* and *non-match* conditions, and *center* and *off-center* conditions in Experiment I, and *center* and *off-center* conditions in Experiment II. The right panel shows related Pearson's correlation coefficients between different pairs of unthresholded Z-maps.

**A. Experiment I – Functional connectivity during match and non-match**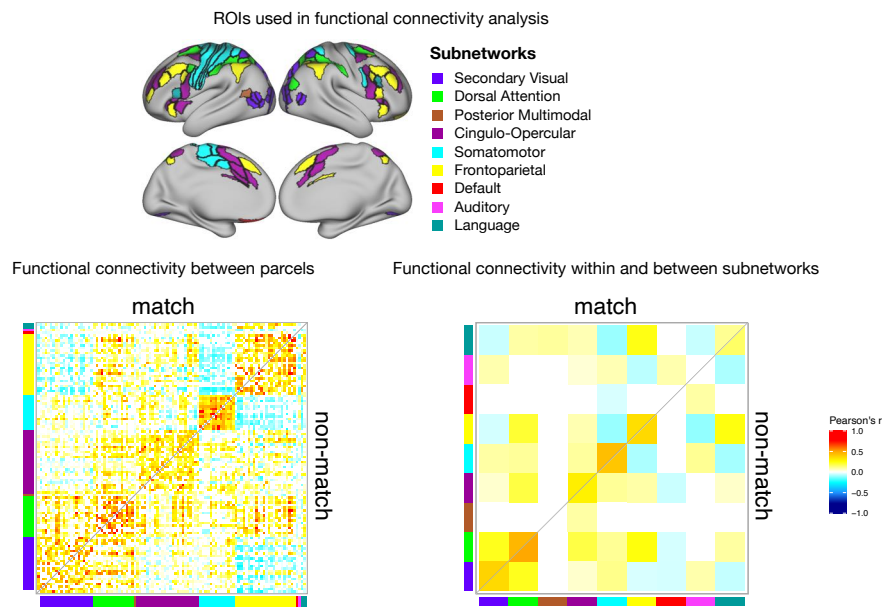**B. Experiment I – Functional connectivity during center and off-center**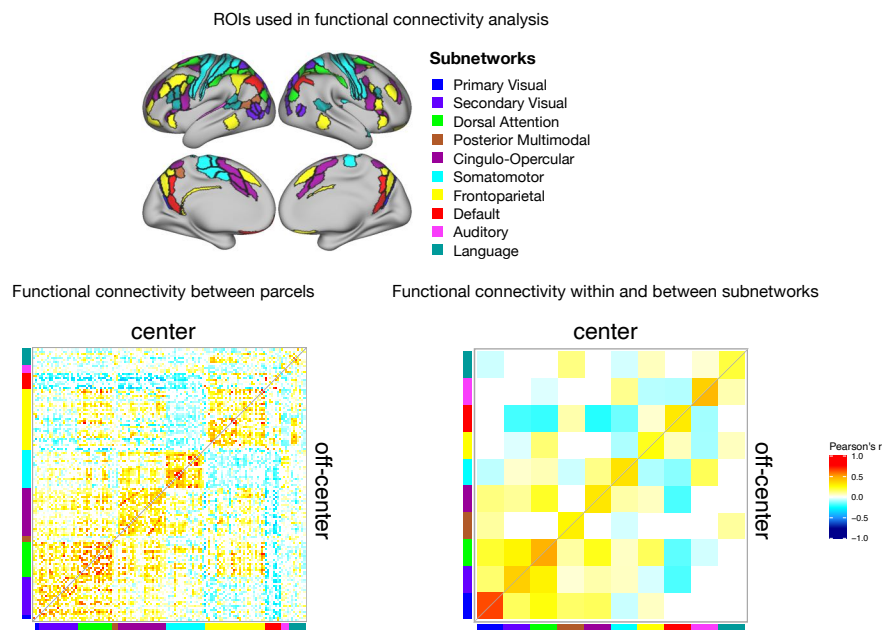

**Figure S5. Functional connectivity within the spatial working memory network during the delay period for each task condition in Experiment I.** The figure shows the functional connectivity between **A.** *match* and *non-match* conditions, and **B.** *center* and *off-center* conditions in the Experiment I. ROIs were identified based on activation analyses as any region that was active during the delay period of any of the task conditions or showed differences in delay activity between the same task conditions. ROIs were then assigned to subnetworks as described in Ji et al. (2019). As a measure of functional connectivity, we calculated Pearson's correlation coefficients between the delay activity of individual ROIs or specific subnetworks. Statistically significant correlations were identified using permutation analysis, using FDR to control for multiple comparisons and thresholding the results at  $q < 0.05$ . The resulting correlation matrices are not symmetric, as they show Pearson's correlation coefficients for the *center* condition in the upper triangle and for the *off-center* condition in the lower triangle.

**A. Experiment II – Differences in positive correlations between center and off-center**

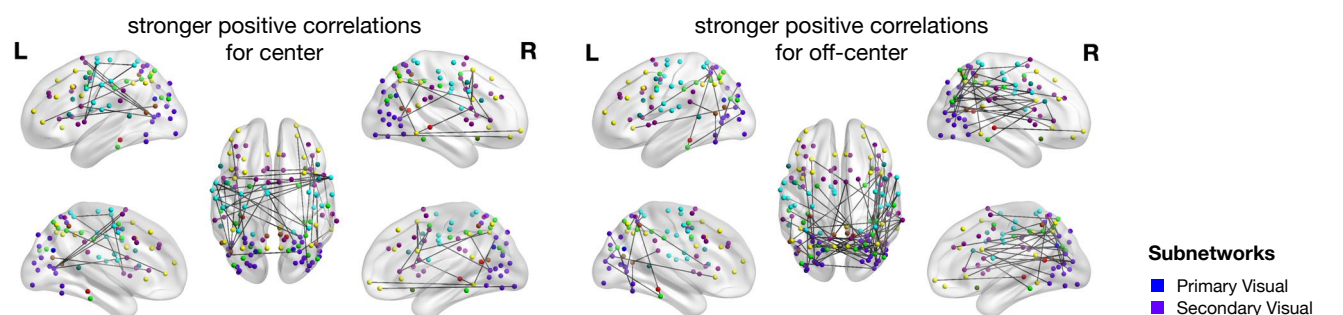

**B. Experiment II – Differences in negative correlations between center and off-center**

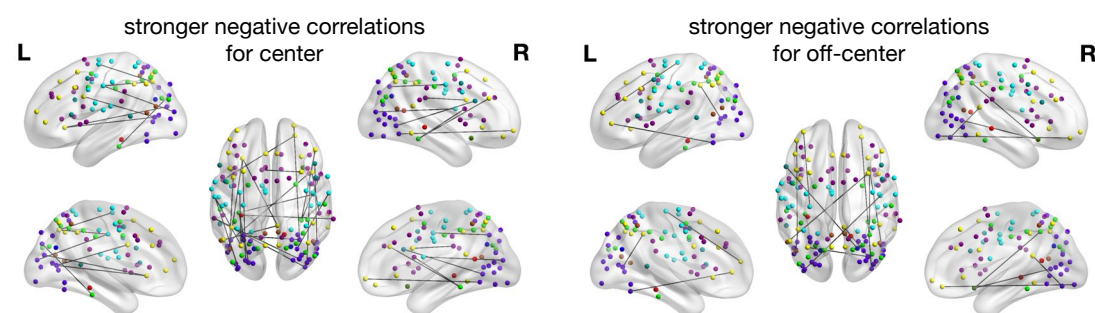

**Figure S6. Differences in functional connectivity between individual ROIs during *center* and *off-center* conditions in Experiment II.** **A.** Positive correlations that were stronger for either the *center* or *off-center* condition. **B.** Negative correlations that were stronger for either the *center* or *off-center* condition. As a measure of functional connectivity, we calculated Pearson's correlation coefficients between the delay activity averaged within each ROI. Statistically significant correlations were identified using permutation analysis, using FDR to control for multiple comparisons and thresholding the results at  $q < 0.05$ .

### 3 SUPPLEMENTARY TABLES

Note: We only identified peaks from regions with an area of at least 30 mm<sup>2</sup> or a volume of at least 35 voxels. We used a spatial smoothing of 10 FWHM before identifying the peaks. Regions were categorized according to the HCP-MMP1.0 parcellation (Glasser et al., 2016), where we considered all parcels that collectively covered 70% of the region's surface area.

**Table S1.** Delay activation peaks across all task conditions and experiments

| Contrast (two-tailed<br><i>t</i> -contrast) | Region                      | Hemisphere | MNI coordinates |       |       | Peak value<br>(Z-score) | uncorrected<br><i>p</i> -value | Size (voxels /<br>grayordinates) | Area<br>(mm <sup>2</sup> ) |
|---------------------------------------------|-----------------------------|------------|-----------------|-------|-------|-------------------------|--------------------------------|----------------------------------|----------------------------|
|                                             |                             |            | x               | y     | z     |                         |                                |                                  |                            |
| activations                                 | SCEF, 24dd, p32pr           | left       | -6.4            | 13.9  | 47.8  | 3.4                     | < .001                         | 329                              | 224.5                      |
|                                             | 24dd                        | left       | -10.0           | -21.5 | 45.4  | 3.2                     | < .001                         | 46                               | 37.6                       |
|                                             | 4                           | left       | -29.9           | -24.4 | 61.1  | 3.5                     | < .001                         | 84                               | 86.1                       |
|                                             | 4                           | left       | -28.0           | -24.3 | 61.8  | 3.4                     | < .001                         | 61                               | 63.5                       |
|                                             | 6a, 6d, FEF                 | left       | -23.7           | -7.4  | 50.5  | 3.6                     | < .001                         | 814                              | 520.1                      |
|                                             | 1                           | left       | -31.4           | -36.3 | 67.1  | 3.1                     | .003                           | 35                               | 30.4                       |
|                                             | 3b, 1                       | left       | -36.2           | -28.7 | 51.0  | 3.5                     | < .001                         | 470                              | 345.2                      |
|                                             | AVI, FOP5                   | left       | -29.6           | 24.0  | 5.3   | 3.3                     | < .001                         | 134                              | 112.4                      |
|                                             | FOP4, 44                    | left       | -40.8           | 18.9  | 6.4   | 3.1                     | .004                           | 46                               | 37.7                       |
|                                             | V4                          | left       | -23.5           | -86.4 | 18.4  | 2.8                     | .010                           | 36                               | 30.9                       |
|                                             | IPS1, IP0, V3B              | left       | -27.4           | -71.5 | 25.6  | 3.6                     | < .001                         | 303                              | 231.8                      |
|                                             | AIP, IP2, 2, LIPd           | left       | -32.9           | -50.9 | 53.6  | 3.5                     | < .001                         | 848                              | 300.3                      |
|                                             | 7PC, LIPv                   | left       | -32.6           | -51.8 | 54.9  | 3.5                     | < .001                         | 79                               | 37.3                       |
|                                             | VIP, MIP, 7PI, LIPv,<br>7Am | left       | -24.8           | -58.4 | 56.8  | 3.5                     | < .001                         | 561                              | 207.5                      |
|                                             | MST, MT                     | left       | -43.1           | -66.8 | 6.3   | 3.2                     | < .001                         | 108                              | 48.0                       |
|                                             | 6r                          | left       | -54.8           | 6.6   | 18.0  | 3.2                     | < .001                         | 61                               | 50.8                       |
|                                             | PEF, 6v, 6r                 | left       | -50.6           | 1.5   | 36.9  | 3.5                     | < .001                         | 207                              | 151.8                      |
|                                             | p9-46v                      | left       | -41.5           | 28.3  | 32.6  | 3.0                     | .005                           | 34                               | 30.6                       |
|                                             | SCEF, 8BM                   | right      | 7.3             | 10.7  | 52.1  | 3.4                     | < .001                         | 185                              | 137.8                      |
|                                             | 6a, FEF                     | right      | 27.0            | -4.4  | 48.9  | 3.6                     | < .001                         | 528                              | 338.0                      |
|                                             | AIP, IP2                    | right      | 38.9            | -39.7 | 42.0  | 3.5                     | < .001                         | 355                              | 111.0                      |
|                                             | FOP5, FOP4                  | right      | 32.6            | 24.5  | 9.5   | 3.4                     | < .001                         | 138                              | 106.7                      |
|                                             | MIP, VIP, 7Am, 7PI          | right      | 22.1            | -64.7 | 55.1  | 3.5                     | < .001                         | 429                              | 181.5                      |
|                                             | IPS1, IP0, V3B              | right      | 30.2            | -67.9 | 29.9  | 3.5                     | < .001                         | 226                              | 167.3                      |
|                                             | AIP, LIPv                   | right      | 35.1            | -46.0 | 51.4  | 3.5                     | < .001                         | 356                              | 121.7                      |
|                                             | MST, MT                     | right      | 44.8            | -64.2 | 6.4   | 3.2                     | < .001                         | 92                               | 47.1                       |
|                                             | 44, FOP4                    | right      | 46.2            | 15.3  | 1.5   | 3.0                     | .002                           | 44                               | 39.2                       |
|                                             | PEF, 6v, 6r                 | right      | 48.6            | 4.2   | 32.7  | 3.4                     | < .001                         | 196                              | 134.2                      |
|                                             | cerebellum                  | right      | 12.0            | -56.0 | -46.0 | 3.1                     | < .001                         | 40                               | –                          |



**Table S2.** Delay deactivation peaks across all task conditions and experiments

| Contrast (two-tailed<br><i>t</i> -contrast) | Region                           | Hemisphere | MNI coordinates |       |       | Peak value<br>(Z-score) | uncorrected<br><i>p</i> -value | Size (voxels /<br>grayordinates) | Area<br>(mm <sup>2</sup> ) |
|---------------------------------------------|----------------------------------|------------|-----------------|-------|-------|-------------------------|--------------------------------|----------------------------------|----------------------------|
|                                             |                                  |            | x               | y     | z     |                         |                                |                                  |                            |
| deactivations                               | POS1, ProS, RSC                  | left       | -10.4           | -52.0 | 5.1   | -3.4                    | < .001                         | 293                              | 192.1                      |
|                                             | d23ab, 31pv                      | left       | -3.4            | -40.9 | 32.7  | -3.2                    | < .001                         | 96                               | 75.6                       |
|                                             | 7m, POS2                         | left       | -2.2            | -65.8 | 27.5  | -3.2                    | < .001                         | 51                               | 63.6                       |
|                                             | 31pd, 31pv                       | left       | -10.5           | -52.7 | 30.5  | -3.3                    | .001                           | 186                              | 125.7                      |
|                                             | 43, OP4                          | left       | -60.4           | -4.8  | 12.6  | -2.9                    | .009                           | 90                               | 66.2                       |
|                                             | PHA3, VVC                        | left       | -32.5           | -32.0 | -16.2 | -3.2                    | < .001                         | 101                              | 111.4                      |
|                                             | V1                               | left       | -2.6            | -70.5 | 4.8   | -3.1                    | < .001                         | 63                               | 79.8                       |
|                                             | V1, V3, V2                       | left       | -2.4            | -88.7 | 16.8  | -3.2                    | < .001                         | 267                              | 274.2                      |
|                                             | V1                               | left       | -9.8            | -57.1 | 1.8   | -3.1                    | < .001                         | 38                               | 49.2                       |
|                                             | POS1                             | left       | -3.6            | -61.6 | 16.3  | -3.2                    | .002                           | 56                               | 65.8                       |
|                                             | v23ab, d23ab,<br>RSC             | left       | -7.0            | -51.6 | 27.3  | -3.3                    | .001                           | 100                              | 84.7                       |
|                                             | PHA1, PHA2,<br>VMV2              | left       | -21.4           | -40.0 | -12.0 | -3.3                    | < .001                         | 182                              | 162.1                      |
|                                             | 8Ad                              | left       | -19.7           | 27.8  | 48.8  | -2.9                    | .003                           | 42                               | 39.6                       |
|                                             | cerebellum                       | left       | -20.0           | -66.0 | -16.0 | -2.8                    | .003                           | 43                               | —                          |
|                                             | cerebellum                       | left       | -20.0           | -48.0 | -54.0 | -2.9                    | .003                           | 47                               | —                          |
|                                             | cerebellum                       | left       | -28.0           | -80.0 | -38.0 | -3.1                    | < .001                         | 511                              | —                          |
|                                             | cerebellum                       | left       | -30.0           | -36.0 | -26.0 | -3.0                    | < .001                         | 47                               | —                          |
|                                             | cerebellum                       | left       | -40.0           | -82.0 | -36.0 | -3.1                    | .009                           | 67                               | —                          |
|                                             | 31pd, v23ab, 31pv,<br>d23ab, RSC | right      | 3.5             | -46.7 | 21.8  | -3.4                    | < .001                         | 476                              | 358.8                      |
|                                             | ProS, POS1, RSC                  | right      | 7.2             | -45.6 | 7.9   | -3.3                    | .006                           | 140                              | 94.2                       |
|                                             | PHA1, VMV1                       | right      | 19.2            | -40.8 | -11.2 | -3.2                    | < .001                         | 124                              | 111.9                      |
|                                             | 2, 7AL                           | right      | 20.8            | -40.4 | 64.2  | -3.1                    | < .001                         | 75                               | 33.6                       |
|                                             | PGi                              | right      | 51.8            | -58.9 | 26.4  | -3.0                    | .002                           | 134                              | 60.2                       |
|                                             | OP2-3, Ig                        | right      | 40.8            | -12.2 | 19.9  | -3.2                    | < .001                         | 105                              | 64.5                       |
|                                             | OP4, 43                          | right      | 51.1            | -6.1  | 9.4   | -3.2                    | < .001                         | 105                              | 68.4                       |
|                                             | PHA2, PHA3                       | right      | 34.1            | -29.8 | -17.3 | -3.0                    | .002                           | 37                               | 37.9                       |
|                                             | V1, V2                           | right      | 4.8             | -66.3 | 5.2   | -3.2                    | < .001                         | 81                               | 102.7                      |
|                                             | V1, V2                           | right      | 5.2             | -87.2 | 13.1  | -3.3                    | < .001                         | 137                              | 163.8                      |
|                                             | V3, V6                           | right      | 7.4             | -82.9 | 34.5  | -3.2                    | < .001                         | 143                              | 150.9                      |
|                                             | ProS, DVT, V2                    | right      | 25.8            | -57.1 | 6.3   | -3.2                    | .005                           | 43                               | 37.5                       |
|                                             | cerebellum                       | right      | 28.0            | -86.0 | -44.0 | -2.8                    | .006                           | 56                               | —                          |
|                                             | cerebellum                       | right      | 22.0            | -76.0 | -32.0 | -2.9                    | .003                           | 175                              | —                          |

**Table S3.** Match vs. non-match delay activity peak differences in Experiment I

| Contrast (two-tailed<br><i>t</i> -contrast) | Region        | Hemisphere | MNI coordinates |       |       | Peak value<br>(Z-score) | Cluster-wise<br>FWE corrected<br><i>p</i> -value | Size (voxels /<br>grayordinates) | Area<br>(mm <sup>2</sup> ) |
|---------------------------------------------|---------------|------------|-----------------|-------|-------|-------------------------|--------------------------------------------------|----------------------------------|----------------------------|
|                                             |               |            | x               | y     | z     |                         |                                                  |                                  |                            |
| match > non-match                           |               |            |                 |       |       |                         |                                                  |                                  |                            |
| delay                                       | 6d            | left       | -38.8           | -12.9 | 63.5  | 3.6                     | .037                                             | 35                               | 55.5                       |
|                                             | 6mp, 6d       | left       | -19.4           | -18.9 | 72.7  | 3.5                     | .037                                             | 38                               | 33.9                       |
|                                             | cerebellum    | right      | 22.0            | -54.0 | -24.0 | 3.9                     | .002                                             | 154                              | –                          |
|                                             | cerebellum    | right      | 10.0            | -56.0 | -14.0 | 3.7                     | .002                                             | 51                               | –                          |
| early delay                                 | 6d, 4         | left       | -39.0           | -17.4 | 62.7  | 3.9                     | .003                                             | 82                               | 98.9                       |
|                                             | 2, 1          | left       | -42.4           | -33.1 | 50.0  | 3.5                     | .013                                             | 102                              | 65.0                       |
|                                             | cerebellum    | right      | 22.0            | -54.0 | -22.0 | 3.8                     | .022                                             | 78                               | –                          |
| match < non-match                           |               |            |                 |       |       |                         |                                                  |                                  |                            |
| delay                                       | 7PI, MIP, VIP | left       | -14.2           | -66.7 | 57.0  | -3.7                    | .026                                             | 178                              | 87.9                       |
|                                             | 6a            | right      | 25.8            | -3.2  | 49.9  | -3.7                    | .041                                             | 90                               | 60.1                       |
|                                             | 3b            | right      | 54.9            | -11.9 | 47.4  | -3.6                    | .030                                             | 70                               | 60.6                       |
|                                             | MIP, VIP, 7PI | right      | 14.5            | -65.5 | 58.9  | -3.7                    | .030                                             | 210                              | 96.3                       |
|                                             | 3a, 4         | right      | 53.8            | -3.5  | 24.0  | -3.6                    | .030                                             | 88                               | 59.5                       |
|                                             | cerebellum    | right      | 36.0            | -74.0 | -28.0 | -3.6                    | .029                                             | 80                               | –                          |
| late delay                                  | 7Pm, 7Am, 7PI | left       | -11.4           | -61.0 | 58.9  | -3.6                    | .013                                             | 121                              | 56.7                       |
|                                             | PCV, 7Pm      | right      | 7.3             | -62.1 | 50.2  | -3.7                    | .029                                             | 113                              | 58.8                       |
|                                             | cerebellum    | right      | 30.0            | -72.0 | -28.0 | -3.5                    | .015                                             | 72                               | –                          |

**Table S4.** Center vs. off-center delay activity peak differences in Experiment I

| Contrast (two-tailed<br>t-contrast) | Region                     | Hemisphere | MNI coordinates |       |       | Peak value<br>(Z-score) | Cluster-wise<br>FWE corrected<br>p-value | Size (voxels /<br>grayordinates) | Area<br>(mm <sup>2</sup> ) |
|-------------------------------------|----------------------------|------------|-----------------|-------|-------|-------------------------|------------------------------------------|----------------------------------|----------------------------|
|                                     |                            |            | x               | y     | z     |                         |                                          |                                  |                            |
| center > off-center                 |                            |            |                 |       |       |                         |                                          |                                  |                            |
| delay                               | 4                          | left       | -39.2           | -14.8 | 56.2  | 3.8                     | .006                                     | 63                               | 67.0                       |
|                                     | 6d                         | left       | -34.8           | -10.0 | 63.1  | 3.7                     | .006                                     | 56                               | 67.0                       |
|                                     | 2, 1                       | left       | -47.8           | -27.6 | 51.3  | 3.6                     | .011                                     | 90                               | 61.5                       |
|                                     | 2, 1                       | left       | -54.9           | -18.6 | 49.2  | 3.6                     | .011                                     | 63                               | 40.3                       |
|                                     | cerebellum                 | right      | 30.0            | -48.0 | -24.0 | 4.0                     | .002                                     | 316                              | —                          |
| early delay                         | 6d                         | left       | -30.6           | -12.5 | 63.9  | 4.1                     | .002                                     | 147                              | 145.6                      |
| late delay                          | cerebellum                 | right      | 16.0            | -52.0 | -20.0 | 3.4                     | .012                                     | 60                               | —                          |
| center < off-center                 |                            |            |                 |       |       |                         |                                          |                                  |                            |
| delay                               | 7Pm, PCV, 7PI,<br>7m, MIP  | left       | -5.9            | -58.4 | 44.3  | -4.3                    | .002                                     | 399                              | 197.9                      |
|                                     | IP1, PGs                   | left       | -38.3           | -67.2 | 46.7  | -3.6                    | .013                                     | 170                              | 94.5                       |
|                                     | 3b, 3a                     | left       | -52.4           | -12.1 | 31.5  | -3.8                    | .007                                     | 152                              | 116.2                      |
|                                     | 4, 3a                      | right      | 35.9            | -22.3 | 56.5  | -3.5                    | < .001                                   | 65                               | 50.4                       |
|                                     | 4                          | right      | 25.3            | -23.2 | 65.8  | -3.6                    | < .001                                   | 54                               | 45.7                       |
|                                     | 3a, 4                      | right      | 8.3             | -27.8 | 73.9  | -3.4                    | < .001                                   | 63                               | 53.3                       |
|                                     | 3b, 3a                     | right      | 30.2            | -28.6 | 64.3  | -3.9                    | < .001                                   | 208                              | 163.5                      |
|                                     | 3b                         | right      | 48.0            | -15.0 | 41.0  | -4.0                    | .004                                     | 110                              | 90.8                       |
|                                     | 7Pm, 7PI, PCV              | right      | 20.8            | -72.1 | 48.6  | -3.6                    | .026                                     | 160                              | 83.0                       |
|                                     | 3b, 3a                     | right      | 55.9            | -7.8  | 28.4  | -3.5                    | .004                                     | 94                               | 81.3                       |
| early delay                         | 3a, 3b                     | right      | 40.9            | -24.4 | 53.6  | -3.6                    | .002                                     | 116                              | 80.3                       |
| late delay                          | 6a, i6-8                   | left       | -24.4           | 4.4   | 53.0  | -4.1                    | .017                                     | 224                              | 135.7                      |
|                                     | PFm, IP2                   | left       | -48.9           | -39.8 | 45.9  | -4.0                    | .021                                     | 165                              | 75.5                       |
|                                     | 7Am, 7Pm, 7PI,<br>VIP, PCV | left       | -9.3            | -64.7 | 57.6  | -4.4                    | < .001                                   | 543                              | 235.2                      |
|                                     | IP1, MIP                   | left       | -25.3           | -65.0 | 38.2  | -3.9                    | < .001                                   | 230                              | 108.2                      |
|                                     | LIPd, IP2                  | left       | -34.4           | -50.5 | 39.4  | -3.9                    | .021                                     | 122                              | 49.1                       |
|                                     | PGp, IP0, V3B              | left       | -35.5           | -85.3 | 27.2  | -3.9                    | < .001                                   | 187                              | 149.5                      |
|                                     | PGs, PGp, IP0              | left       | -36.7           | -77.8 | 36.4  | -3.9                    | < .001                                   | 110                              | 92.0                       |
|                                     | 3b                         | left       | -51.3           | -11.4 | 27.3  | -3.5                    | .046                                     | 27                               | 32.5                       |
|                                     | 3a, 3b                     | left       | -49.0           | -11.1 | 26.8  | -3.5                    | .046                                     | 69                               | 51.3                       |
|                                     | V2                         | left       | -10.1           | -82.1 | -11.1 | -3.9                    | .028                                     | 44                               | 46.7                       |
|                                     | V1                         | left       | -3.8            | -87.7 | -3.6  | -3.9                    | .028                                     | 56                               | 77.5                       |
|                                     | cerebellum                 | left       | -8.0            | -76.0 | -30.0 | -3.8                    | .005                                     | 75                               | —                          |
|                                     | 7Pm, 7PI, MIP,<br>POS2     | right      | 7.8             | -64.1 | 51.8  | -4.0                    | .005                                     | 341                              | 146.8                      |
|                                     | IP1, MIP, IP0              | right      | 30.7            | -64.0 | 34.1  | -3.9                    | .001                                     | 144                              | 79.0                       |
|                                     | IPS1, MIP                  | right      | 28.3            | -64.0 | 35.1  | -3.9                    | .001                                     | 41                               | 32.7                       |
|                                     | PGp, PGs, IP0              | right      | 41.2            | -76.0 | 33.1  | -4.2                    | .001                                     | 201                              | 145.3                      |
|                                     | PFm, IP2                   | right      | 50.9            | -34.9 | 47.7  | -3.6                    | .031                                     | 202                              | 65.4                       |
|                                     | 3b                         | right      | 60.7            | -6.2  | 32.6  | -3.7                    | .018                                     | 74                               | 61.2                       |
|                                     | 3a, 4                      | right      | 44.4            | -10.1 | 30.8  | -3.5                    | .018                                     | 38                               | 33.0                       |
|                                     | 6a, i6-8                   | right      | 28.9            | 9.9   | 52.9  | -3.9                    | .026                                     | 117                              | 75.3                       |

**Table S5.** Center vs. off-center delay activity peak differences in Experiment II

| Contrast (two-tailed<br><i>t</i> -contrast) | Region              | Hemisphere | MNI coordinates |       |       | Peak value<br>(Z-score) | Cluster-wise<br>FWE corrected<br><i>p</i> -value | Size (voxels /<br>grayordinates) | Area<br>(mm <sup>2</sup> ) |
|---------------------------------------------|---------------------|------------|-----------------|-------|-------|-------------------------|--------------------------------------------------|----------------------------------|----------------------------|
|                                             |                     |            | x               | y     | z     |                         |                                                  |                                  |                            |
| center > off-center                         |                     |            |                 |       |       |                         |                                                  |                                  |                            |
| delay                                       | 6d, 4               | left       | -38.8           | -9.6  | 62.0  | 4.2                     | .002                                             | 171                              | 177.8                      |
|                                             | 1, 2                | left       | -54.0           | -21.5 | 45.7  | 4.3                     | .002                                             | 262                              | 159.2                      |
|                                             | OP1, OP4, PF        | left       | -50.8           | -23.6 | 19.1  | 3.9                     | .004                                             | 230                              | 136.7                      |
|                                             | cerebellum          | right      | 26.0            | -46.0 | -28.0 | 4.0                     | .006                                             | 146                              | —                          |
|                                             | cerebellum          | right      | 22.0            | -54.0 | -16.0 | 4.0                     | .006                                             | 138                              | —                          |
| early delay                                 | SCEF                | left       | -8.9            | -5.4  | 67.6  | 4.3                     | .047                                             | 64                               | 44.1                       |
|                                             | 6d, 4, 6mp          | left       | -34.8           | -11.2 | 64.2  | 4.9                     | .006                                             | 375                              | 307.0                      |
|                                             | 2                   | left       | -39.3           | -34.3 | 46.5  | 4.0                     | .006                                             | 136                              | 65.8                       |
|                                             | 1, 2                | left       | -52.2           | -23.2 | 45.5  | 4.1                     | .006                                             | 261                              | 159.9                      |
|                                             | 3b, 3a              | left       | -38.8           | -24.3 | 46.9  | 3.9                     | .006                                             | 120                              | 89.3                       |
|                                             | PF, PFt             | left       | -54.2           | -26.3 | 35.6  | 3.8                     | .006                                             | 84                               | 53.8                       |
|                                             | cerebellum          | right      | 10.0            | -52.0 | -20.0 | 3.9                     | < .001                                           | 506                              | —                          |
| center < off-center                         |                     |            |                 |       |       |                         |                                                  |                                  |                            |
| delay                                       | 6a                  | left       | -22.1           | -5.4  | 56.6  | -4.0                    | .004                                             | 221                              | 139.0                      |
|                                             | IPS1, DVT, V7       | left       | -20.6           | -68.6 | 42.5  | -3.8                    | .001                                             | 154                              | 132.6                      |
|                                             | PCV, 7Am            | left       | -5.7            | -55.8 | 55.6  | -3.7                    | .040                                             | 99                               | 52.7                       |
|                                             | VIP, 7Am, LIPv      | left       | -22.0           | -60.2 | 59.5  | -4.2                    | .001                                             | 234                              | 95.5                       |
|                                             | PGp, PGs            | left       | -34.7           | -84.2 | 30.5  | -3.8                    | .019                                             | 88                               | 82.8                       |
|                                             | 4, 3a               | right      | 30.7            | -23.3 | 52.4  | -3.7                    | .024                                             | 59                               | 47.3                       |
|                                             | 6a                  | right      | 24.8            | -3.4  | 50.8  | -4.4                    | .006                                             | 219                              | 129.5                      |
|                                             | IPS1, MIP, 7PI, VIP | right      | 24.5            | -70.2 | 44.5  | -4.4                    | .006                                             | 321                              | 212.6                      |
|                                             | 7Am, VIP            | right      | 13.2            | -61.1 | 61.6  | -3.8                    | .006                                             | 81                               | 39.2                       |
|                                             | 7Am, PCV            | right      | 5.5             | -47.7 | 56.0  | -4.0                    | .006                                             | 173                              | 78.4                       |
|                                             | IP0, PGs            | right      | 36.8            | -71.3 | 39.2  | -3.8                    | .018                                             | 113                              | 92.0                       |
|                                             | LIPv, AIP           | right      | 27.2            | -62.6 | 51.5  | -4.0                    | .006                                             | 196                              | 82.3                       |
|                                             | TPOJ3, PGp          | right      | 47.3            | -70.3 | 16.1  | -3.7                    | .036                                             | 50                               | 33.8                       |
|                                             | POS1                | right      | 18.4            | -61.4 | 26.7  | -3.5                    | .024                                             | 48                               | 45.9                       |
| late delay                                  | 6a                  | left       | -26.0           | -5.0  | 49.0  | -4.4                    | < .001                                           | 262                              | 161.2                      |
|                                             | DVT, POS2           | left       | -11.8           | -73.1 | 41.2  | -3.9                    | < .001                                           | 98                               | 64.6                       |
|                                             | PCV                 | left       | -5.8            | -54.2 | 51.5  | -3.8                    | .008                                             | 122                              | 66.0                       |
|                                             | VIP, 7Pm, 7Am       | left       | -21.9           | -62.0 | 56.3  | -4.0                    | < .001                                           | 242                              | 107.2                      |
|                                             | PGp, PGs            | left       | -41.1           | -76.2 | 29.6  | -3.9                    | .010                                             | 74                               | 72.6                       |
|                                             | PCV                 | right      | 7.2             | -47.1 | 57.1  | -4.0                    | .001                                             | 121                              | 68.3                       |
|                                             | 6a                  | right      | 26.0            | -1.4  | 51.0  | -4.2                    | < .001                                           | 168                              | 108.2                      |
|                                             | 6a                  | right      | 23.1            | 0.2   | 59.5  | -3.7                    | < .001                                           | 48                               | 35.3                       |
|                                             | IPS1, MIP, 7PI      | right      | 23.1            | -67.9 | 45.9  | -4.2                    | < .001                                           | 237                              | 145.4                      |
|                                             | 7Am, 7Pm            | right      | 11.7            | -62.0 | 60.3  | -4.0                    | .001                                             | 136                              | 58.6                       |



**Table S6.** Center vs. off-center parcellated delay activity differences in Experiment I

| Contrast (two-tailed<br><i>t</i> -contrast) | Region | Hemisphere | Z-score | FDR corrected<br><i>p</i> -value |
|---------------------------------------------|--------|------------|---------|----------------------------------|
| center > off-center                         |        |            |         |                                  |
| delay                                       | 6d     | left       | 3.4     | .030                             |
|                                             | FOP2   | left       | 3.2     | .036                             |
| center < off-center                         |        |            |         |                                  |
| delay                                       | RSC    | left       | -3.1    | .036                             |
|                                             | POS2   | left       | -2.9    | .036                             |
|                                             | PCV    | left       | -4.2    | .030                             |
|                                             | STV    | left       | -3.2    | .030                             |
|                                             | 7Pm    | left       | -4.3    | .030                             |
|                                             | 7m     | left       | -4.3    | .030                             |
|                                             | POS1   | left       | -3.3    | .031                             |
|                                             | 7PL    | left       | -3.7    | .030                             |
|                                             | MIP    | left       | -3.3    | .036                             |
|                                             | a47r   | left       | -3.1    | .030                             |
|                                             | IFSp   | left       | -3.3    | .032                             |
|                                             | 10pp   | left       | -3.1    | .030                             |
|                                             | i68    | left       | -3.5    | .036                             |
|                                             | PBelt  | left       | -3.7    | .036                             |
|                                             | TE1p   | left       | -3.3    | .030                             |
|                                             | TPOJ1  | left       | -3.0    | .030                             |
|                                             | TPOJ3  | left       | -2.9    | .043                             |
|                                             | DVT    | left       | -3.5    | .040                             |
|                                             | PGp    | left       | -3.5    | .030                             |
|                                             | IP2    | left       | -3.1    | .035                             |
|                                             | IP1    | left       | -3.3    | .036                             |
|                                             | PGs    | left       | -3.3    | .031                             |
|                                             | A4     | left       | -3.5    | .036                             |
|                                             | 4      | right      | -3.4    | .030                             |
|                                             | 3b     | right      | -4.0    | .030                             |
|                                             | POS2   | right      | -2.8    | .030                             |
|                                             | 7Pm    | right      | -3.6    | .036                             |
|                                             | 7m     | right      | -2.6    | .030                             |
|                                             | POS1   | right      | -2.8    | .036                             |
|                                             | 7PL    | right      | -3.6    | .036                             |
|                                             | 1      | right      | -2.7    | .037                             |
|                                             | 3a     | right      | -3.8    | .030                             |
|                                             | OP23   | right      | -3.0    | .036                             |
|                                             | STGa   | right      | -2.3    | .045                             |
|                                             | TE1p   | right      | -2.8    | .030                             |
|                                             | TPOJ1  | right      | -2.3    | .036                             |
|                                             | DVT    | right      | -2.7    | .030                             |
|                                             | PGp    | right      | -3.2    | .030                             |
|                                             | IP1    | right      | -2.9    | .044                             |
|                                             | IP0    | right      | -3.1    | .030                             |
|                                             | PGs    | right      | -3.7    | .030                             |
|                                             | MBelt  | right      | -3.3    | .030                             |

**Table S7.** Center vs. off-center parcellated delay activity differences in Experiment II – Part 1

| Contrast (two-tailed<br><i>t</i> -contrast) |      | Region | Hemisphere | Z-score | FDR corrected<br><i>p</i> -value |
|---------------------------------------------|------|--------|------------|---------|----------------------------------|
| center > off-center                         |      |        |            |         |                                  |
| delay                                       | 24dd |        | left       | 2.5     | .040                             |
|                                             | 1    |        | left       | 4.0     | .006                             |
|                                             | 2    |        | left       | 3.3     | .005                             |
|                                             | 6d   |        | left       | 4.5     | .002                             |
|                                             | 6mp  |        | left       | 2.6     | .024                             |
|                                             | OP4  |        | left       | 3.5     | .002                             |
|                                             | OP1  |        | left       | 3.8     | .003                             |
|                                             | PFcm |        | left       | 3.5     | .006                             |
|                                             | FOP1 |        | left       | 3.7     | .006                             |
|                                             | FOP2 |        | left       | 2.8     | .024                             |
|                                             | PFt  |        | left       | 2.7     | .037                             |
|                                             | PF   |        | left       | 3.7     | .012                             |
|                                             | PFcm |        | right      | 3.1     | .016                             |
|                                             | FOP1 |        | right      | 2.5     | .035                             |
|                                             | FOP2 |        | right      | 3.0     | .009                             |

**Table S8.** Center vs. off-center parcellated delay activity differences in Experiment II – Part 2

| Contrast (two-tailed<br><i>t</i> -contrast) | Region | Hemisphere | Z-score | FDR corrected<br><i>p</i> -value |
|---------------------------------------------|--------|------------|---------|----------------------------------|
| center < off-center                         |        |            |         |                                  |
| delay                                       | FEF    | left       | -2.6    | .035                             |
|                                             | V7     | left       | -3.5    | < .001                           |
|                                             | IPS1   | left       | -4.6    | .006                             |
|                                             | FFC    | left       | -2.5    | .041                             |
|                                             | V3B    | left       | -3.7    | .002                             |
|                                             | PCV    | left       | -4.3    | .004                             |
|                                             | 7Pm    | left       | -3.4    | .006                             |
|                                             | 7Am    | left       | -4.1    | < .001                           |
|                                             | 7PL    | left       | -4.0    | .002                             |
|                                             | LIPv   | left       | -3.7    | .009                             |
|                                             | VIP    | left       | -5.7    | .003                             |
|                                             | MIP    | left       | -3.8    | .009                             |
|                                             | LIPd   | left       | -2.9    | .029                             |
|                                             | 6a     | left       | -4.6    | .003                             |
|                                             | PHA3   | left       | -3.0    | .012                             |
|                                             | TPOJ3  | left       | -4.0    | .003                             |
|                                             | DVT    | left       | -3.4    | .007                             |
|                                             | PGp    | left       | -4.9    | .002                             |
|                                             | IP0    | left       | -3.0    | .012                             |
|                                             | V6A    | left       | -3.0    | .020                             |
|                                             | VMV3   | left       | -2.9    | .013                             |
|                                             | PHA2   | left       | -2.6    | .041                             |

**Table S9.** Center vs. off-center parcellated delay activity differences in Experiment II – Part 3

| Contrast (two-tailed<br><i>t</i> -contrast) | Region | Hemisphere | Z-score | FDR corrected<br><i>p</i> -value |
|---------------------------------------------|--------|------------|---------|----------------------------------|
| center < off-center                         |        |            |         |                                  |
| delay                                       | V8     | right      | -3.0    | .017                             |
|                                             | 4      | right      | -2.5    | .013                             |
|                                             | 3b     | right      | -2.7    | .030                             |
|                                             | RSC    | right      | -2.5    | .030                             |
|                                             | V7     | right      | -4.2    | .002                             |
|                                             | IPS1   | right      | -5.1    | .002                             |
|                                             | V3B    | right      | -3.2    | .009                             |
|                                             | MT     | right      | -3.2    | .009                             |
|                                             | PCV    | right      | -4.1    | .004                             |
|                                             | 7Pm    | right      | -3.5    | < .001                           |
|                                             | POS1   | right      | -2.7    | .017                             |
|                                             | 7AL    | right      | -2.4    | .047                             |
|                                             | 7Am    | right      | -4.2    | < .001                           |
|                                             | 7PL    | right      | -3.7    | < .001                           |
|                                             | LIPv   | right      | -4.8    | .004                             |
|                                             | VIP    | right      | -4.8    | .004                             |
|                                             | MIP    | right      | -4.5    | .004                             |
|                                             | 1      | right      | -2.3    | .042                             |
|                                             | 3a     | right      | -2.5    | .030                             |
|                                             | IFJp   | right      | -2.3    | .039                             |
|                                             | a10p   | right      | -2.7    | .030                             |
|                                             | LIPd   | right      | -2.6    | .048                             |
|                                             | 6a     | right      | -5.0    | .004                             |
|                                             | i68    | right      | -3.2    | < .001                           |
|                                             | AAIC   | right      | -2.6    | .018                             |
|                                             | AIP    | right      | -3.1    | .012                             |
|                                             | PHA3   | right      | -2.6    | .030                             |
|                                             | STSvp  | right      | -2.5    | .030                             |
|                                             | TE1p   | right      | -3.0    | .008                             |
|                                             | TPOJ3  | right      | -4.0    | .006                             |
|                                             | DVT    | right      | -3.2    | .015                             |
|                                             | PGp    | right      | -4.4    | .006                             |
|                                             | IP1    | right      | -2.8    | .030                             |
|                                             | IP0    | right      | -4.4    | .004                             |
|                                             | V6A    | right      | -4.2    | .002                             |
|                                             | VMV3   | right      | -2.6    | .025                             |
|                                             | V4t    | right      | -3.0    | .028                             |
|                                             | FST    | right      | -2.9    | .024                             |
|                                             | V3CD   | right      | -3.1    | .012                             |
|                                             | LO3    | right      | -3.0    | .009                             |



## REFERENCES

- Allen, P. J., Josephs, O., and Turner, R. (2000). A Method for Removing Imaging Artifact from Continuous EEG Recorded during Functional MRI. *NeuroImage* 12, 230–239. doi:10/dqfx4j
- Funahashi, S. (2015). Functions of delay-period activity in the prefrontal cortex and mnemonic scotomas revisited. *Front. Syst. Neurosci.* 9, 2. doi:10.3389/fnsys.2015.00002
- Glasser, M. F., Coalson, T. S., Robinson, E. C., Hacker, C. D., Harwell, J., Yacoub, E., et al. (2016). A multi-modal parcellation of human cerebral cortex. *Nature* 536, 171–178. doi:10/f8z3gb
- Ji, J. L., Spronk, M., Kulkarni, K., Repovš, G., Anticevic, A., and Cole, M. W. (2019). Mapping the human brain's cortical-subcortical functional network organization. *NeuroImage* 185, 35–57. doi:10/ggd8dm
- Jia, Y. and Tyler, C. W. (2019). Measurement of saccadic eye movements by electrooculography for simultaneous EEG recording. *Behav Res* 51, 2139–2151. doi:10/ghvmpr
- Mullen, T. (2012). NTRC: CleanLine.
- Niazy, R., Beckmann, C., Iannetti, G., Brady, J., and Smith, S. (2005). Removal of FMRI environment artifacts from EEG data using optimal basis sets. *NeuroImage* 28, 720–737. doi:10.1016/j.neuroimage.2005.06.067
- van der Meer, J. N., Pampel, A., Van Someren, E. J., Ramautar, J. R., van der Werf, Y. D., Gomez-Herrero, G., et al. (2016). Carbon-wire loop based artifact correction outperforms post-processing EEG/fMRI corrections—A validation of a real-time simultaneous EEG/fMRI correction method. *NeuroImage* 125, 880–894. doi:10.1016/j.neuroimage.2015.10.064
